# Supplementary material
Source: PubMed Central journal article supplement (PMC2829832)
Supplement: NIHMS167754-supplement-1_si_001.pdf [file NIHMS167754-supplement-1_si_001.pdf]

**A sensitive and rapid method for amino acid quantitation in malaria biological samples using AccQ•Tag UPLC-ESI-MS/MS with multiple reaction monitoring**

**Authors:** Jenny M. Armenta<sup>1</sup>, Diego F. Cortes<sup>1</sup>, John M. Pisciotta<sup>2</sup>, Joel L. Shuman<sup>1</sup>, Kenneth Blakeslee<sup>3</sup>, Dominique Rasolosen<sup>2</sup>, Oluwatosin Ogunbiyi<sup>2</sup>, David J. Sullivan, Jr<sup>2</sup>, Vladimir Shulaev<sup>1,4,5\*</sup>

**Affiliation:** (1) Virginia Bioinformatics Institute, Virginia Polytechnic Institute and State University, Blacksburg, VA 24061; (2) W. Harry Feinstone Department of Molecular Microbiology and Immunology, Bloomberg School of Public Health, 615 N. Wolfe St., Baltimore MD 21205; (3) Waters Corporation, MedStar Building, Suite 103, 5565 Sterrett Place, Columbia, MD 21044; (4) Department of Horticulture, Virginia Polytechnic Institute and State University, Blacksburg, VA 24061; (5) Department of Cancer Biology, Wake Forest University School of Medicine, Winston-Salem, NC 27157

**\*Corresponding Author:**

Vladimir Shulaev

Virginia Bioinformatics Institute, Virginia Polytechnic Institute and State University

Washington Street, Blacksburg, VA 24061-0477, USA

E-mail: [vshulaev@vbi.vt.edu](mailto:vshulaev@vbi.vt.edu)

Phone: 540-231-3489

Fax: 540-231-2606

## TABLE OF CONTENTS

|                                                                                                                                                                                                                                                                                  |    |
|----------------------------------------------------------------------------------------------------------------------------------------------------------------------------------------------------------------------------------------------------------------------------------|----|
| <i>Plasmodium Falciparum</i> Culture Protocol.....                                                                                                                                                                                                                               | 4  |
| <b>Figure S-1.</b> Schematic reaction of amino acid derivatization with AccQ•Tag reagent.....                                                                                                                                                                                    | 5  |
| <b>Figure S-2.</b> Typical chromatograms for AccQ•Tag tag derivatized amino acids detected in <i>P. falciparum</i> trophozoites, obtained with UPLC-MS/MS using multiple reaction monitoring.....                                                                                | 6  |
| <b>Figure S-3.</b> Biological reproducibility for AccQ•Tag derivatized amino acids detected in <i>P. falciparum</i> rings or trophozoites.....                                                                                                                                   | 7  |
| <b>Table S-1.</b> Retention times and parent ions observed for AccQ•Tag derivatized physiological amino acid standards and isotopically labeled amino acids, analyzed by UPLC-MS.....                                                                                            | 8  |
| <b>Table S-2.</b> Optimal cone voltage and collision energy for selected AccQ•Tag derivatized amino acid standards analyzed by ESI-MS/MS, using a triple quadrupole mass spectrometer, and, either, low flow (20 $\mu$ L/min) or combined flow (200 $\mu$ L/min total flow)..... | 9  |
| <b>Table S-3.</b> Peak area reproducibility for AccQ•Tag labeled physiological amino acid standards analyzed by UPLC-MS/MS using 001 s and 002 s dwell time .....                                                                                                                | 10 |
| <b>Table S-4.</b> Dynamic range, high limits of linearity, low limits of linearity, and detection limits for AccQ•Tag physiological amino acids standards.....                                                                                                                   | 11 |
| <b>Table S-5.</b> Technical reproducibility for AccQ•Tag derivatized amino acids detected and measured in <i>P. falciparum</i> ring and trophozoite developmental stages.....                                                                                                    | 12 |

**Table S-6.** Biological reproducibility across peak areas measured for AccQ•Tag derivatized isotopically labeled amino acid internal standards spiked into red blood cells.....13

**Equation S-1.** The detection limit.....14

***Plasmodium Falciparum* Culture Protocol.** *P. falciparum* clone 3D7 was grown at 2-3% haematocrit in RPMI 1640 medium supplemented with 10% (v/v) human serum. Uninfected red blood cells (RBCs) for parasite culture were obtained fresh weekly from a limited stable pool of screened O+ donors. Parasite stage synchrony was maintained using sorbitol lysis. Ring and trophozoite stage parasites were purified by saponin lysis and then washed twice with ice cold PBS. The hemozoin content for each ring and trophozoite stage parasite pellet was determined colorimetrically.<sup>44</sup> Independent replicates (flasks) were prepared. After centrifugation at 8000g, the pellets containing the whole mature parasites were stored at -80 °C before being analyzed for amino acid content. Parasite growth and preparation was done at Johns Hopkins University.

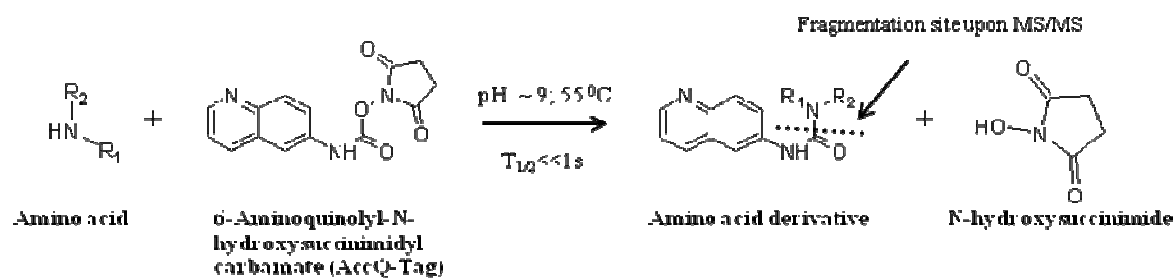

**Figure S-1.** Schematic reaction of amino acid derivatization with AccQ•Tag reagent.

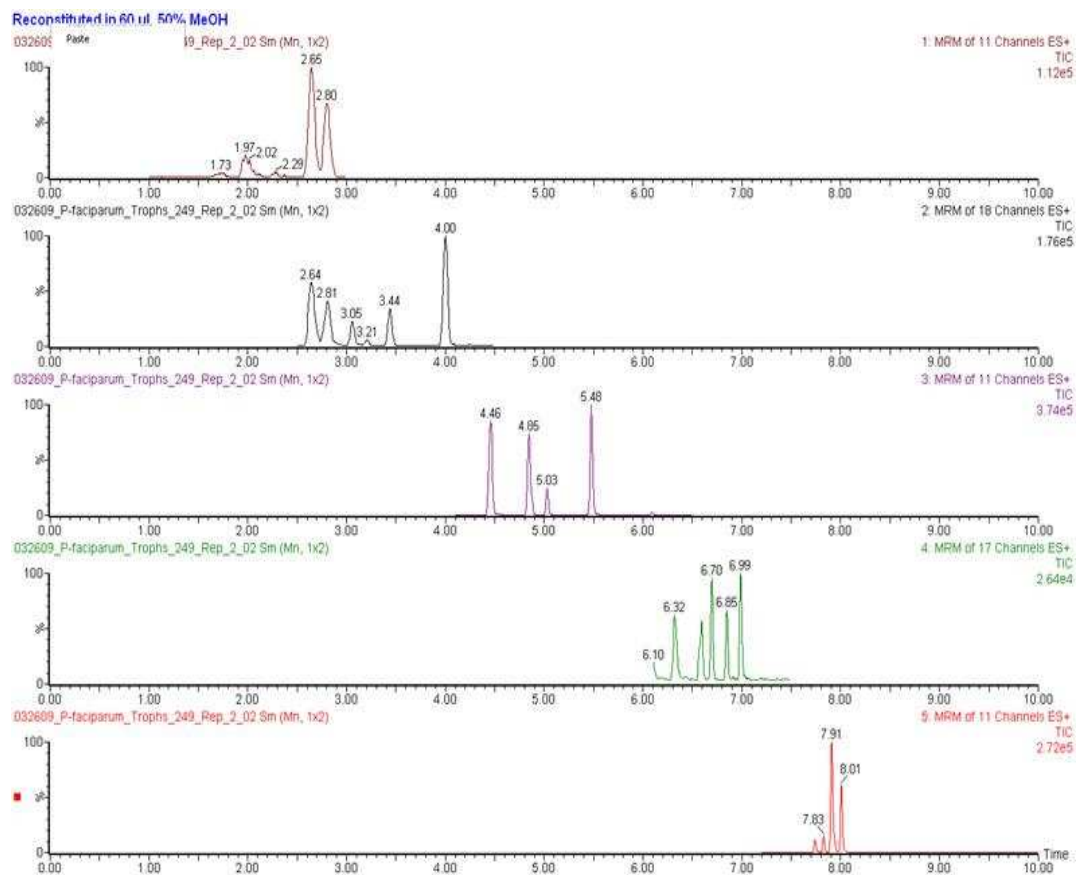

**Figure S-2.** Typical chromatograms for AccQ•Tag tag derivatized amino acids detected in *P. falciparum* trophozoites, obtained with UPLC-MS/MS using multiple reaction monitoring. Experimental conditions were the same as in Table S-3.

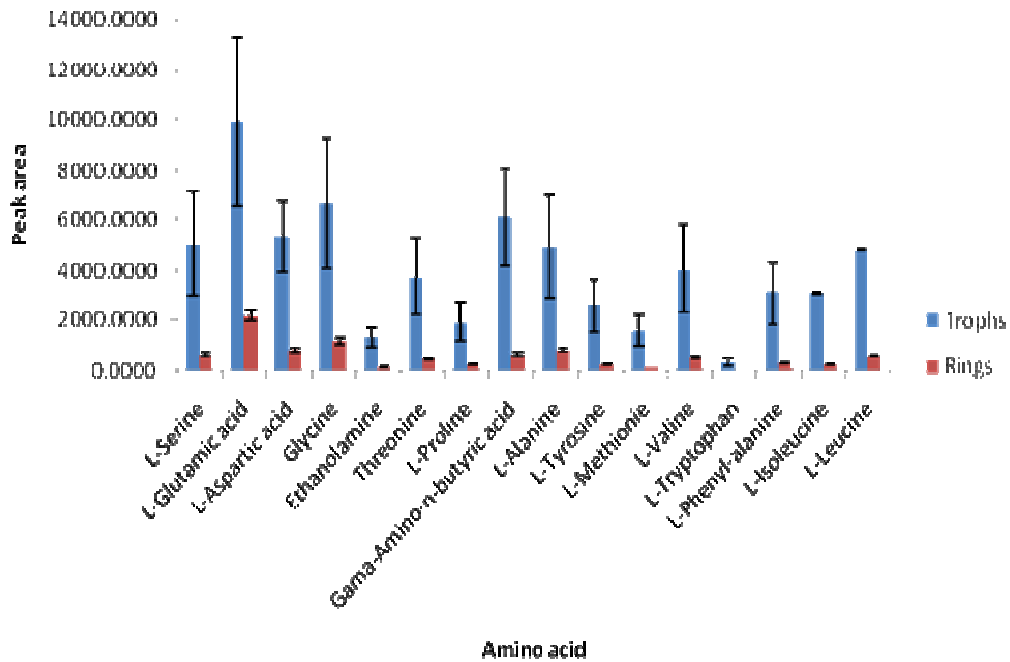

**Figure S-3.** Biological reproducibility for AccQ•Tag derivatized amino acids detected in *P. falciparum* rings or trophozoites. Experimental conditions were the same as in Table S-3.

**Table S-1.** Retention times and parent ions observed for AccQ•Tag derivatized physiological amino acid standards and isotopically labeled amino acids, analyzed by UPLC-MS.

| Amino acid                                                           | FW     | AccQ•Tag fragment (m/z) | Predicted parent ion (m/z) | Observed parent ion (m/z) | RT (min) |
|----------------------------------------------------------------------|--------|-------------------------|----------------------------|---------------------------|----------|
| 4-Hydroxy-L-proline                                                  | 131.11 | 171                     | 302.11                     | 302.14                    | 1.86     |
| Histidine (ring 2- <sup>13</sup> C)                                  | 156.21 | 171                     | 327.21                     | 327.09                    | 1.76     |
| L-Histidine                                                          | 155.21 | 171                     | 326.21                     | 326.13                    | 1.82     |
| 1-Methyl-histidine                                                   | 169.21 | 171                     | 340.21                     | 340.22                    | 2.23     |
| Taurine                                                              | 125.11 | 171                     | 296.11                     | 296.08                    | 2.32     |
| 3-Methyl-histidine                                                   | 169.21 | 171                     | 340.21                     | 340.22                    | 2.48     |
| Serine,2,3,3-d <sub>3</sub>                                          | 108.11 | 171                     | 279.11                     | 279.08                    | 2.69     |
| L-Serine                                                             | 105.11 | 171                     | 276.11                     | 276.12                    | 2.75     |
| Arginine (guanido- <sup>15</sup> N <sub>2</sub> )                    | 176.36 | 171                     | 347.36                     | 347.13                    | 2.95     |
| L-Arginine                                                           | 174.21 | 171                     | 345.21                     | 345.16                    | 3.07     |
| Glycine-d <sub>5</sub>                                               | 77.25  | 171                     | 248.25                     | 248.03                    | 3.11     |
| Glycine                                                              | 75.08  | 171                     | 246.08                     | 246.11                    | 3.13     |
| L-Carnosine                                                          | 226.21 | 171                     | 397.21                     | 397.15                    | 3.2      |
| Ethanolamine                                                         | 61.09  | 171                     | 232.09                     | 232.16                    | 3.29     |
| L-Asparagine- <sup>15</sup> N <sub>2</sub>                           | 134.27 | 171                     | 305.27                     | 305.11                    | 3.47     |
| L-Aspartic acid                                                      | 133.11 | 171                     | 304.11                     | 304.14                    | 3.47     |
| L-Sarcosine                                                          | 89.17  | 171                     | 260.17                     | 260.17                    | 3.91     |
| Citrulline-ureido- <sup>13</sup> C                                   | 176.35 | 171                     | 347.35                     | 347.14                    | 4.01     |
| L-Glutamic acid -2,4,4-d <sub>3</sub>                                | 150.11 | 171                     | 321.11                     | 321.06                    | 4.03     |
| L-Glutamic acid                                                      | 147.11 | 171                     | 318.11                     | 318.15                    | 4.03     |
| L-Citrulline                                                         | 175.21 | 171                     | 346.21                     | 346.15                    | 4.06     |
| β-Alanine                                                            | 89.17  | 171                     | 260.17                     | 260.1                     | 4.29     |
| L-Threonine ( <sup>13</sup> C, <sup>15</sup> N)                      | 124.11 | 171                     | 295.11                     | 295.06                    | 4.52     |
| L-Threonine                                                          | 119.11 | 171                     | 290.11                     | 290.18                    | 4.52     |
| L-Alanine                                                            | 89.1   | 171                     | 260.1                      | 260.1                     | 4.9      |
| D-L-Alanine-2,3,3,3-d <sub>4</sub>                                   | 93.11  | 171                     | 264.11                     | 264.13                    | 4.91     |
| γ-Amino-n-butyric acid                                               | 103.11 | 171                     | 274.11                     | 274.15                    | 5.07     |
| D-L-β-Aminoisobutyric acid                                           | 103.11 | 171                     | 274.11                     | 274.14                    | 5.52     |
| Proline-2,5,5-d <sub>3</sub>                                         | 118.32 | 171                     | 289.32                     | 289.12                    | 5.56     |
| L-Proline                                                            | 115.16 | 171                     | 286.16                     | 286.16                    | 5.58     |
| δ-hydroxylysine                                                      | 161.31 | 171                     | 33.31                      | 333.18                    | 5.72     |
| L-α-Amino-n-butyric acid                                             | 103.11 | 171                     | 274.11                     | 274.16                    | 6.11     |
| Ornithine-3,3,4,4,5,5-d <sub>6</sub>                                 | 308.22 | 171                     | 479.22                     | 479.22                    | 6.23     |
| L-Ornithine                                                          | 132.21 | 171                     | 303.21                     | -                         | 6.24     |
| Lysine-3,3,4,4,4,5,5,6,6-d <sub>8</sub> -01                          | 324.58 | 171                     | 495.58                     | 495.26                    | 6.62     |
| L-Lysine                                                             | 146.21 | 171                     | 317.21                     | 315.15                    | 6.63     |
| 4-Hydroxyphenyl-2,6-d <sub>2</sub> -alanine-2-d <sub>1</sub> -01     | 184.22 | 171                     | 355.22                     | 355.22                    | 6.68     |
| Tyrosine                                                             | 181.21 | 171                     | 352.21                     | 352.17                    | 6.74     |
| Methionine-methyl-d <sub>3</sub>                                     | 152.13 | 171                     | 323.4                      | 323.13                    | 6.85     |
| L-Methionine                                                         | 149.21 | 171                     | 320.21                     | 320.16                    | 6.91     |
| Valine-d <sub>8</sub>                                                | 125.11 | 171                     | 296.11                     | 296.21                    | 7.02     |
| L-Valine                                                             | 117.21 | 171                     | 288.21                     | 288.16                    | 7.02     |
| L-Isoleucine                                                         | 131.21 | 171                     | 302.21                     | 302.19                    | 7.83     |
| Leucine-d <sub>10</sub>                                              | 141.24 | 171                     | 312.24                     | 312.24                    | 7.84     |
| L-Leucine                                                            | 131.21 | 171                     | 302.21                     | 302.16                    | 7.89     |
| Phenyl-d <sub>5</sub> -alanine                                       | 170.21 | 171                     | 341.21                     | 341.11                    | 7.97     |
| Phenylalanine                                                        | 165.21 | 171                     | 336.21                     | 336.24                    | 8.01     |
| Tryptophan-2',4',5',6',7'-d <sub>5</sub> (indole-d <sub>5</sub> )-01 | 209.21 | 171                     | 380.21                     | 380.21                    | 8.07     |
| Tryptophan                                                           | 204.21 | 171                     | 375.21                     | 375.17                    | 8.11     |

Note: Separation was performed on a 2.1 mm i.d. x 100 mm AccQ•Tag column; MS data was acquired using full scan MS mode; the concentration of each derivatized amino acid standard was 0.25 μmol/mL, and 1 μL of sample was injected. Separation conditions were the same as reported in the experimental section-UPLC analysis.



**Table S-2.** Optimal cone voltage and collision energy for selected AccQ•Tag derivatized amino acid standards analyzed by ESI-MS/MS, using a triple quadrupole mass spectrometer, and, either, low flow (20  $\mu\text{L}/\text{min}$ ) or combined flow (200  $\mu\text{L}/\text{min}$  total flow).

| Amino acid<br>(symbol)  | Side chain<br>polarity/<br>charge at pH 7.0 | Parent/<br>Daughter<br>transition | Run<br># | Experimental values |         | Values implemented |         |
|-------------------------|---------------------------------------------|-----------------------------------|----------|---------------------|---------|--------------------|---------|
|                         |                                             |                                   |          | Cone (V)            | CE (eV) | Cone (V)           | CE (eV) |
| Alanine (A)             | Non-polar/neutral                           | 260/171                           | 1        | 30                  | 24      | 32                 | 25      |
|                         |                                             |                                   | 2        | 33                  | 27      |                    |         |
| Arginine (L)            | Polar/acidic                                | 345.23/171                        | 1        | 34                  | 18      | 35                 | 19      |
|                         |                                             |                                   | 2        | 35                  | 21      |                    |         |
| Glutamic acid<br>(E)    | Polar/basic                                 | 318.11/171                        | 1        | 32                  | 24      | 32                 | 24      |
|                         |                                             |                                   | 2        | 32                  | 24      |                    |         |
| Glycine (G)             | Non-polar/neutral                           | 246.16/171                        | 1        | 34                  | 22      | 33                 | 20      |
|                         |                                             |                                   | 2        | 33                  | 19      |                    |         |
| 4-Hydroxy-L-<br>Proline | Polar                                       | 302.20/171                        | 1        | 34                  | 21      | 33                 | 22      |
|                         |                                             |                                   | 2        | 33                  | 23      |                    |         |
| Isoleucine (I)          | Non-polar/neutral                           | 302.20/171                        | 1        | 40                  | 33      | 39                 | 35      |
|                         |                                             |                                   | 2        | 38                  | 38      |                    |         |
| Proline (P)             | Non-polar/neutral                           | 286.16/171                        | 1        | 30                  | 23      | 29                 | 21      |
|                         |                                             |                                   | 2        | 29                  | 20      |                    |         |
| Serine (S)              | Polar/neutral                               | 276.12/171                        | 1        | 37                  | 19      | 37                 | 19      |
|                         |                                             |                                   | 2        | 37                  | 19      |                    |         |
| Threonine (T)           | Polar/neutral                               | 290.18/171                        | 1        | 31                  | 22      | 31                 | 22      |
|                         |                                             |                                   | 2        | 33                  | 20      |                    |         |
| Valine (V)              | Non-polar/neutral                           | 288.23/171                        | 1        | 36                  | 25      | 35                 | 24      |
|                         |                                             |                                   | 2        | 34                  | 26      |                    |         |

**Table S-3.** Peak area reproducibility for AccQ•Tag labeled physiological amino acid standards analyzed by UPLC-MS/MS using 001 s and 002 s dwell time. Experimental conditions: 2.1 x 100 mm AccQ•Tag column; 0.25  $\mu$ mol/mL AccQ•Tag derivatized physiological amino acids, 1  $\mu$ L sample injection volume; positive ionization mode.

| Amino acid                         | RT   | 001 s Dwell time (method # 1) |           |       | 0.02 s Dwell time (method # 2) |           |       |
|------------------------------------|------|-------------------------------|-----------|-------|--------------------------------|-----------|-------|
|                                    |      | Area                          | STD       | CV    | Area                           | STD       | CV    |
| 4-Hydroxy-L-Proline                | 1.64 | 5444.3256                     | 271.1593  | 4.98  | 5566.8097                      | 646.6690  | 11.62 |
| L-Histidine                        | 1.78 | 500.9280                      | 29.4190   | 5.87  | 488.3001                       | 62.8618   | 12.87 |
| 1 Methyl-histidine                 | 2.19 | 572.4806                      | 39.9383   | 6.98  | 548.2807                       | 64.9612   | 11.85 |
| Taurine                            | 2.33 | 1409.6150                     | 91.6646   | 6.50  | 1398.6956                      | 130.2501  | 9.31  |
| 3-Methyl histidine                 | 2.43 | 616.5313                      | 50.6220   | 8.21  | 620.9461                       | 53.2337   | 8.57  |
| L-Serine                           | 2.74 | 7519.0145                     | 480.3950  | 6.39  | 6271.4555                      | 440.3902  | 7.02  |
| L-Carnosine                        | 2.97 | 1654.0044                     | 174.6027  | 10.56 | 1587.3623                      | 137.3719  | 8.65  |
| L-Arginine                         | 2.99 | 769.2371                      | 128.9220  | 16.76 | 789.6934                       | 177.4694  | 22.47 |
| Glycine                            | 3.11 | 10279.6715                    | 777.3611  | 7.56  | 10452.1492                     | 1167.6755 | 11.17 |
| Ethanolamine                       | 3.26 | 21888.1744                    | 1317.5921 | 6.02  | 21197.9733                     | 1411.7032 | 6.66  |
| L-Aspartic acid                    | 3.49 | 3551.6079                     | 275.4630  | 7.76  | 3439.9399                      | 273.6357  | 7.95  |
| L-Sarcosine                        | 3.92 | 6131.3008                     | 372.8854  | 6.08  | 6100.9862                      | 521.2789  | 8.54  |
| L-Glutamic acid                    | 4.06 | 5853.6262                     | 360.9170  | 6.17  | 5837.1004                      | 483.4357  | 8.28  |
| L-Citrulline                       | 4.07 | 2845.7597                     | 243.6547  | 8.56  | 2668.5124                      | 302.5678  | 11.34 |
| $\beta$ -Alanine                   | 4.28 | 12007.7519                    | 987.0927  | 8.22  | 11343.6462                     | 1262.2200 | 11.13 |
| Threonine                          | 4.50 | 9210.8077                     | 717.7032  | 7.79  | 8910.4477                      | 720.4672  | 8.09  |
| L-Alanine                          | 4.91 | 11642.4342                    | 624.2984  | 5.36  | 11221.9654                     | 831.0872  | 7.41  |
| $\gamma$ -Amino-n-butyric acid     | 5.07 | 18697.5293                    | 1153.9400 | 6.17  | 18948.8163                     | 1452.7136 | 7.67  |
| Amino adipic acid                  | 5.28 | 8627.1619                     | 527.4358  | 6.11  | 9085.8054                      | 623.4739  | 6.86  |
| $\delta$ -hydroxylysine            | 5.28 | 337.5054                      | 26.8940   | 7.97  | 370.3647                       | 33.4606   | 9.03  |
| D-L- $\beta$ -Aminoisobutyric acid | 5.52 | 18053.7697                    | 954.1240  | 5.28  | 18133.5832                     | 1254.2389 | 6.92  |
| L-Proline                          | 5.54 | 6326.2104                     | 418.1214  | 6.61  | 6147.9922                      | 339.2061  | 5.52  |
| L- $\alpha$ -Amino-n-butyric acid  | 6.13 | 9715.2046                     | 1182.5514 | 12.17 | 7804.3374                      | 2328.0226 | 29.83 |
| L-Lysine                           | 6.62 | 442.1846                      | 48.1525   | 10.89 | 417.6766                       | 59.7404   | 14.30 |
| L-Tyrosine                         | 6.71 | 7888.3505                     | 790.2071  | 10.02 | 7035.4064                      | 890.3845  | 12.66 |
| L-Methionie                        | 6.87 | 7535.2930                     | 580.4547  | 7.70  | 6727.8577                      | 819.6171  | 12.18 |
| L-Valine                           | 7.01 | 8312.5817                     | 484.0699  | 5.82  | 8299.6486                      | 764.0349  | 9.21  |
| L-Isoleucine                       | 7.76 | 7208.9950                     | 503.8162  | 6.99  | 6715.6008                      | 655.1755  | 9.76  |
| L-Leucine                          | 7.84 | 7503.3079                     | 297.0700  | 3.96  | 6774.5927                      | 418.1853  | 6.17  |
| L-Phenylalanine                    | 7.95 | 8739.0914                     | 483.1840  | 5.53  | 8157.0873                      | 709.8919  | 8.70  |
| L-Tryptophan                       | 8.05 | 7330.4634                     | 557.2566  | 7.60  | 6766.0857                      | 728.1215  | 10.76 |

**Table S-4.** Dynamic range, high limits of linearity, low limits of linearity, and detection limits for AccQ•Tag physiological amino acids standards. Experimental conditions were the same as in Table S-3.

| Amino acid                         | Dynamic range | High limits of linearity (pmol/ $\mu$ L) | Low limits of linearity (fmol/ $\mu$ L) | Detection limit (fmol) | R <sup>2</sup> |
|------------------------------------|---------------|------------------------------------------|-----------------------------------------|------------------------|----------------|
| Hydroxy-L-proline                  | 100           | 6.25                                     | 24.41                                   | 1.65                   | 0.9943         |
| L-Histidine                        | 100           | 6.25                                     | 97.65                                   | 13.28                  | 0.9967         |
| 1-Methyl-histidine                 | 100           | 12.5                                     | 97.65                                   | 17.95                  | 0.9925         |
| Taurine                            | 100           | 12.5                                     | 195.31                                  | 3.95                   | 0.9993         |
| 3-Methyl-histidine                 | 1000          | 25                                       | 97.65                                   | 12.05                  | 0.998          |
| L-Serine                           | 1000          | 25                                       | 24.41                                   | 1.65                   | 0.9949         |
| L-Arginine                         | 100           | 25                                       | 390.6                                   | 11.9                   | 0.9979         |
| Glycine                            | 10000         | 25                                       | 3.05                                    | 1.65                   | 0.9929         |
| L-Carnosine                        | 1000          | 25                                       | 97.65                                   | 5.88                   | 0.988          |
| Ethanolamine                       | 1000          | 12.5                                     | 48.82                                   | 1.65                   | 0.9959         |
| L-Aspartic acid                    | 100           | 6.25                                     | 24.41                                   | 3.49                   | 0.9715         |
| L-Sarcosine                        | 1000          | 25                                       | 97.65                                   | 1.65                   | 0.9976         |
| L-Glutamic acid                    | 100           | 6.25                                     | 12.22                                   | 5.4                    | 0.983          |
| L-Citrulline                       | 100           | 25                                       | 390.62                                  | 3.98                   | 0.985          |
| $\beta$ -Alanine                   | 1000          | 12.5                                     | 24.41                                   | 2.27                   | 0.9902         |
| L-Threonine                        | 1000          | 25                                       | 48.82                                   | 2.63                   | 0.9988         |
| L-Alanine                          | 1000          | 25                                       | 48.82                                   | 1.85                   | 0.9997         |
| $\gamma$ -Amino-n-butyric acid     | 1000          | 12.5                                     | 12.2                                    | 1.65                   | 0.9958         |
| Amino adipic acid                  | 1000          | 12.5                                     | 97.65                                   | 1.79                   | 0.9894         |
| D-L- $\beta$ -Aminoisobutyric acid | 1000          | 12.5                                     | 24.41                                   | 1.65                   | 0.9955         |
| L-Proline                          | 1000          | 25                                       | 24.41                                   | 2.83                   | 0.9993         |
| L- $\alpha$ -Amino-n-butyric acid  | 1000          | 25                                       | 12.2                                    | 1.71                   | 0.9956         |
| Tyrosine                           | 1000          | 25                                       | 48.82                                   | 3.85                   | 0.994          |
| L-Methionine                       | 1000          | 25                                       | 12.2                                    | 1.65                   | 0.9952         |
| L-Valine                           | 1000          | 25                                       | 24.41                                   | 1.65                   | 0.9977         |
| L-Isoleucine                       | 1000          | 12.5                                     | 48.82                                   | 1.65                   | 0.998          |
| L-Leucine                          | 1000          | 25                                       | 48.82                                   | 1.65                   | 0.9983         |
| Phenylalanine                      | 10000         | 25                                       | 6.1                                     | 4.01                   | 0.9997         |
| Tryptophan                         | 1000          | 25                                       | 97.65                                   | 7.57                   | 0.9993         |

**Table S-5.** Technical reproducibility for AccQ•Tag derivatized amino acids detected and measured in *P. falciparum* ring and trophozoite developmental stages. Experimental conditions were the same as in Table S-3.

| Amino acid                     | <i>P. falciparum</i> rings |        |         | <i>P. falciparum</i> trophozoites |        |         |
|--------------------------------|----------------------------|--------|---------|-----------------------------------|--------|---------|
|                                | Area                       | CV (%) | STError | Area                              | CV (%) | STError |
| Serine                         | 477.279                    | 9.18   | 25.283  | 19898.23                          | 3.40   | 390.496 |
| Glutamic acid                  | 1797.766                   | 8.77   | 90.979  | 35119.162                         | 1.51   | 306.028 |
| Aspartic acid                  | 723.568                    | 8.79   | 36.708  | 15799.672                         | 3.85   | 350.793 |
| Glycine                        | 1588.287                   | 5.70   | 52.301  | 25272.032                         | 3.78   | 550.982 |
| Ethanolamine                   | 35.475                     | -      | -       | 4054.876                          | 3.77   | 88.296  |
| Threonine                      | 371.736                    | 10.97  | 23.545  | 14843.529                         | 3.60   | 308.860 |
| Proline                        | 252.636                    | 11.63  | 16.969  | 7050.015                          | 5.16   | 210.157 |
| $\gamma$ -Amino-n-butyric acid | 847.659                    | 5.11   | 24.986  | 20764.828                         | 3.42   | 409.662 |
| Alanine                        | 757.857                    | 6.20   | 27.147  | 20275.084                         | 2.63   | 307.478 |
| Tyrosine                       | 249.737                    | 6.94   | 10.004  | 10160.909                         | 5.42   | 317.880 |
| Methionine                     | 112.121                    | 11.77  | 7.619   | 6187.525                          | 9.70   | 346.406 |
| Valine                         | 522.668                    | 18.23  | 55.020  | 17250.195                         | 4.87   | 484.700 |
| Tryptophan                     | 31.945                     | 17.12  | 3.158   | 1440.356                          | 6.85   | 56.984  |
| Phenylalanine                  | 276.702                    | 15.33  | 24.496  | 12079.774                         | 3.85   | 268.163 |
| Isoleucine                     | 225.678                    | 10.21  | 13.301  | 13221.078                         | 4.93   | 376.061 |
| Leucine                        | 596.329                    | 3.29   | 11.311  | 20383.451                         | 5.45   | 641.467 |

**Table S-6.** Biological reproducibility across peak areas measured for AccQ•Tag derivatized isotopically labeled amino acid internal standards spiked into red blood cells. Experimental conditions were the same as in Table S-3. The biological reproducibility was calculated across 6 biological replicates, each analyzed three times by UPLC-MS/MS.

| <b>Isotopically labeled amino acid</b>                               | <b>Area</b> | <b>STD</b> | <b>CV (%)</b> |
|----------------------------------------------------------------------|-------------|------------|---------------|
| Serine-2,3,3-d <sub>3</sub>                                          | 633.933     | 77.011     | 12.15         |
| Glycine-d <sub>5</sub>                                               | 350.138     | 38.025     | 10.86         |
| L-Asparagine- <sup>15</sup> -N <sub>2</sub>                          | 279.149     | 37.790     | 13.54         |
| L-Glutamic acid-2,4,4-d <sub>3</sub>                                 | 220.429     | 26.247     | 11.91         |
| Threonine-d <sub>5</sub>                                             | 625.824     | 60.447     | 9.66          |
| D-L-Alanine-2,3,3,3-d <sub>4</sub>                                   | 788.569     | 72.753     | 9.23          |
| Proline-2,5,5-d <sub>3</sub>                                         | 583.957     | 55.182     | 9.45          |
| Ornithine-3,3,4,4,5,5-d <sub>6</sub>                                 | 209.369     | 30.879     | 14.75         |
| 4-Hydroxyphenyl-2,6-d <sub>2</sub> -alanine-2-d <sub>1</sub> -01     | 292.036     | 42.140     | 14.43         |
| Methionine-methyl-d <sub>3</sub>                                     | 747.010     | 56.910     | 7.62          |
| Valine-d <sub>8</sub>                                                | 487.745     | 64.640     | 13.25         |
| Leucine-d <sub>10</sub>                                              | 983.879     | 29.082     | 2.96          |
| Phenyl-d <sub>5</sub> -alanine                                       | 537.870     | 75.172     | 13.98         |
| Tryptophan-2',4',5',6',7'-d <sub>5</sub> (indole-d <sub>5</sub> )-01 | 376.856     | 49.308     | 13.08         |

**Equation S-1**

The detection limit, which is the lowest concentration that produces a signal within a certain confidence level, was calculated using the following equation.

$$\text{LOD} = 3 \times \text{STD}_{\text{blank}} / m$$

Where: LOD is the limit of detection;  $\text{STD}_{\text{blank}}$  is the standard deviation of the blank and  $m$  is the slope of the calibration curve.
